# Supplementary material for: Study on the one-pot oxidative esterification of glycerol with MOF supported polyoxometalates as catalyst
Source: Royal Society of Chemistry journal article supplement (doi:10.1039/c5cy00102a), 2015-01-01
Supplement: c5cy00102a1.pdf [file c5cy00102a1.pdf]

## Study on one-step oxidative esterification of glycerol with MOF supported polyoxometalates as catalyst

Jie Zhu,<sup>a</sup> Peng-cheng Wang <sup>\*a</sup> and Ming Lu<sup>\*a</sup>

<sup>a</sup> School of Chemical Engineering, Nanjing University of science and technology, Xiaolingwei 200, Nanjing, Jiangsu Province, China.

Fax: 86 25 84315514; Tel: 86 25 84315030;

E-mail: [luming@mail.njust.edu.cn](mailto:luming@mail.njust.edu.cn) (M. Lu)/ [alexwpch@mail.njust.edu.cn](mailto:alexwpch@mail.njust.edu.cn) (P. -C. Wang).

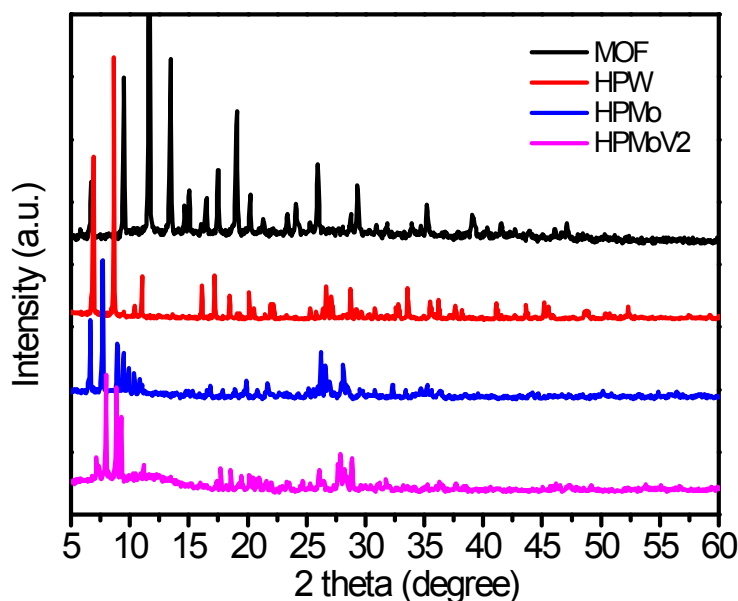

Figure S1 XRD patterns of MOF and POM raw materials

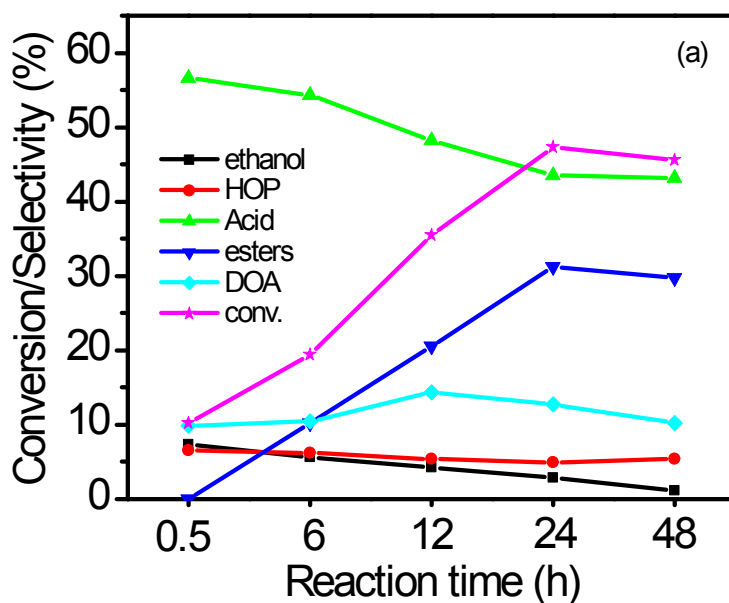

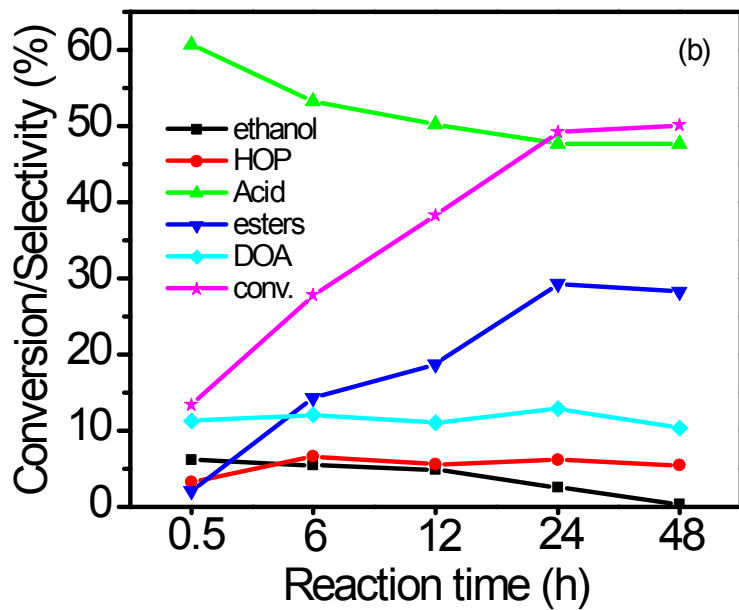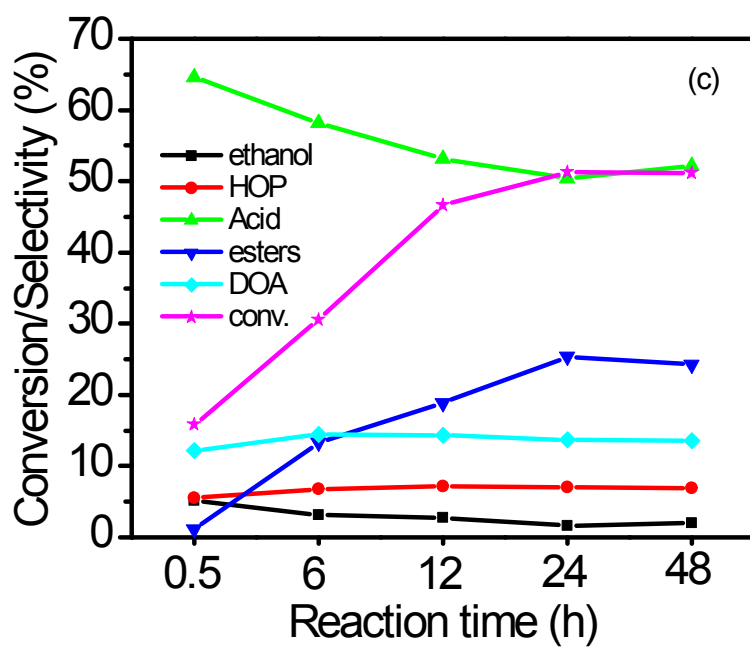

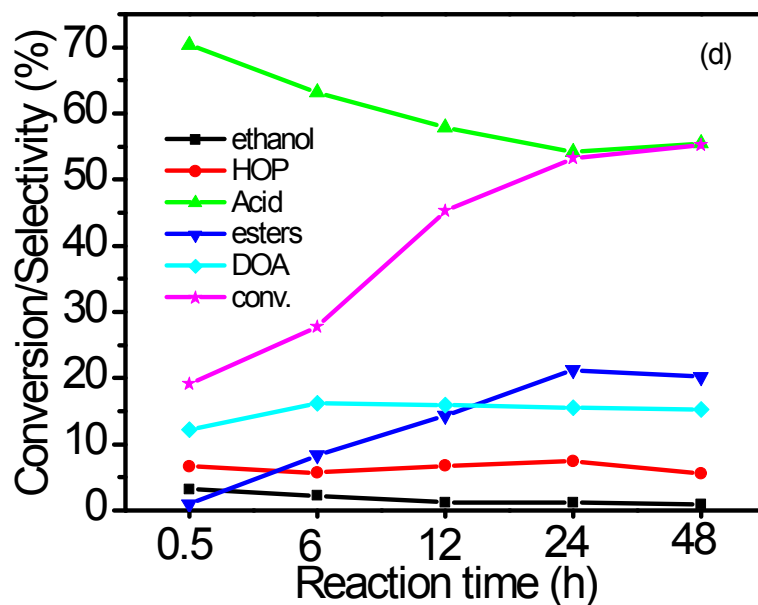

Figure S2 Products distribution of glycerol transformation over (a) MOF-HPMo; (b) MOF-HPMoV1; (c) MOF-HPMoV2; (d) MOF-HPMoV3. Reaction conditions: glycerol 5 mmol, deionized H<sub>2</sub>O 2 mL, H<sub>2</sub>O<sub>2</sub> (1 mL a.q., 30% w.t.), catalyst 20 mg, 40°C, 24 h.

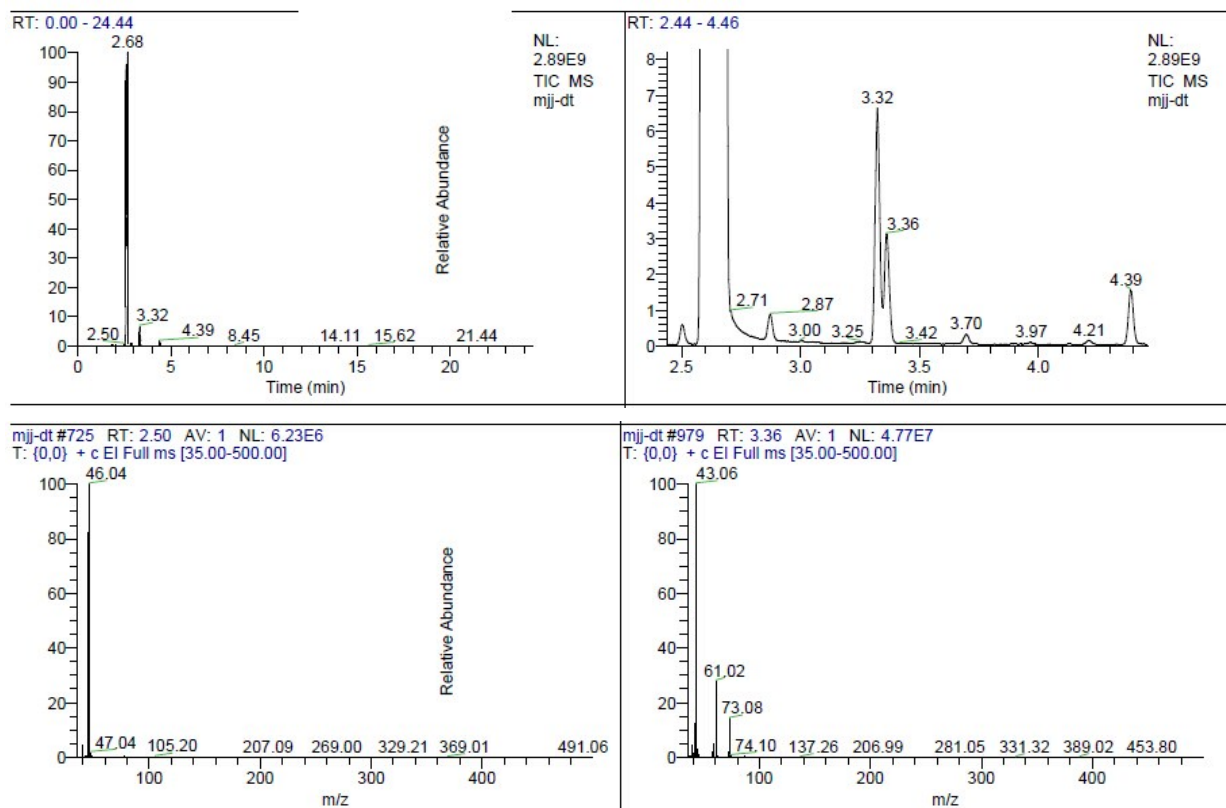

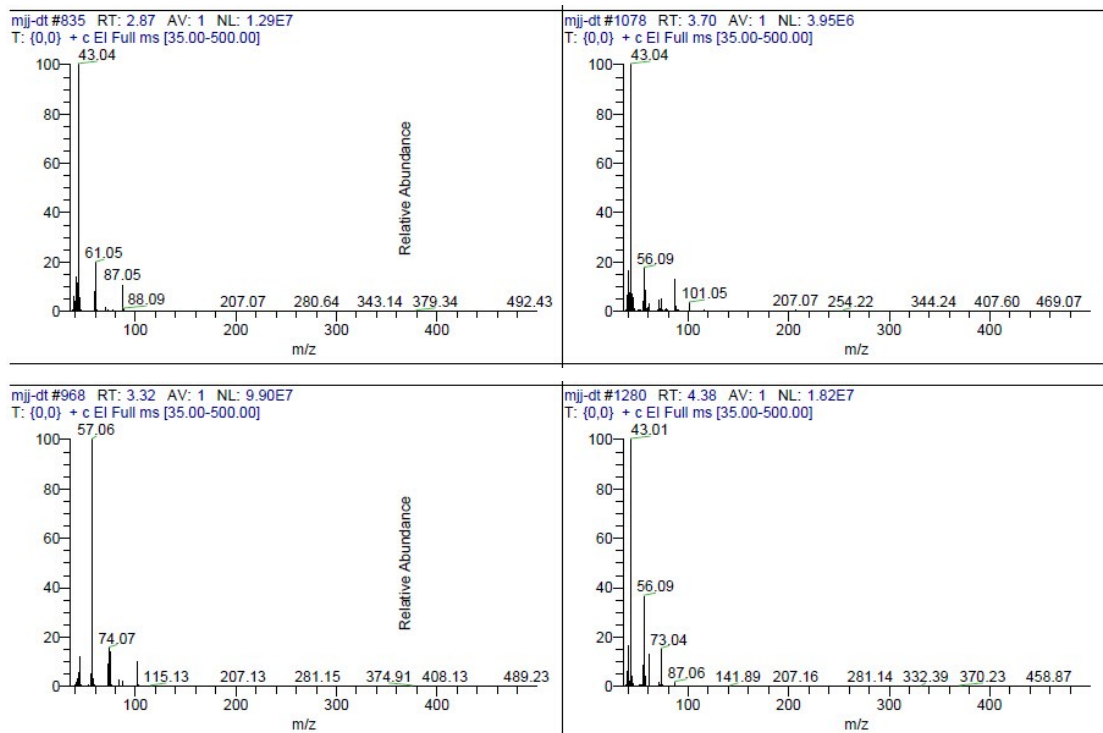

Figure S3 GC-MS results, reaction conditions: lycerol 5 mmol, MOF-HPW 20 mg, deionized H<sub>2</sub>O 2 mL, H<sub>2</sub>O<sub>2</sub> (1 mL a.q., 30% w.t.), 40°C, 24 h.

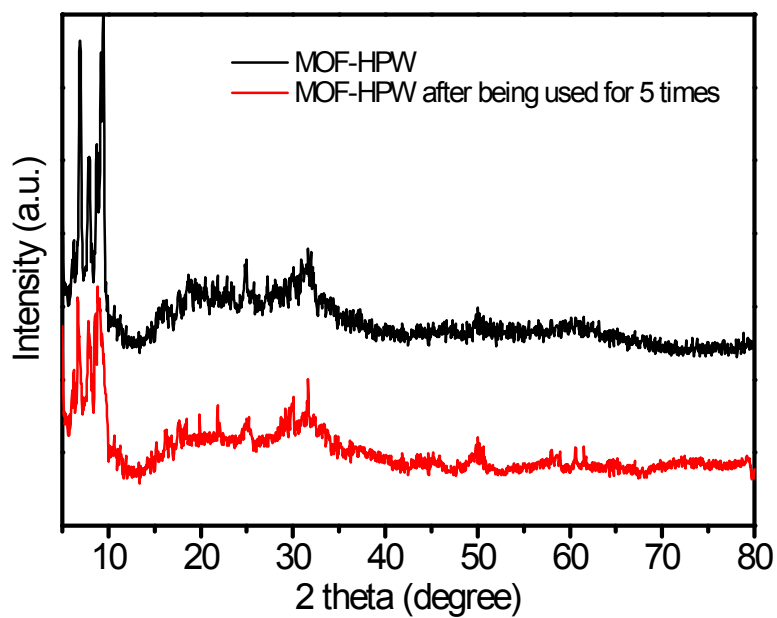

Figure S4 XRD patterns of MOF-HPW and MOF-HPW after being used for 5 times.

Table S1 Concentration of H<sub>2</sub>O<sub>2</sub> after reaction <sup>a</sup>

| pH value                                               | 4     | 6     | 8     | 8 <sup>b</sup> |
|--------------------------------------------------------|-------|-------|-------|----------------|
| H <sub>2</sub> O <sub>2</sub> concentration<br>(mol/L) | 0.039 | 0.036 | 0.016 | 0.043          |

<sup>a</sup> Reaction conditions: glycerol 5 mmol, deionized H<sub>2</sub>O 2 mL, H<sub>2</sub>O<sub>2</sub> (1 mL a.q., 30% w.t.), catalyst 20 mg, 40°C, 24 h.

<sup>b</sup> Another 1 mL H<sub>2</sub>O<sub>2</sub> was added.
